# Supplementary material for: Local thermal environment and warming influence supercooling and drive widespread shifts in the metabolome of diapausing Pieris rapae butterflies
Source: Oxford University Press journal article supplement (doi:10.1242/jeb.243118), 2021-10-25
Supplement: jeb243118supp.pdf [file jeb243118supp.pdf]

**Table S1. KEGG pathways significantly enriched in the metabolomic response to warming (MS Peaks to Pathways, MetaboAnalyst)(Chong et al. 2019).**

| Pathway                                     | Total Compounds | Compounds in Dataset | P-val | Adjusted P-val | NES   |
|---------------------------------------------|-----------------|----------------------|-------|----------------|-------|
| Glycine, serine and threonine metabolism    | 25              | 17                   | 0.010 | 0.079          | 1.81  |
| Amino sugar and nucleotide sugar metabolism | 34              | 20                   | 0.010 | 0.079          | 1.607 |
| Pyruvate metabolism                         | 24              | 15                   | 0.010 | 0.079          | 1.885 |
| Fructose and mannose metabolism             | 18              | 13                   | 0.010 | 0.079          | 1.562 |
| beta-Alanine metabolism                     | 13              | 8                    | 0.011 | 0.079          | 1.724 |
| Valine, leucine and isoleucine degradation  | 35              | 10                   | 0.011 | 0.079          | 1.676 |
| Valine, leucine and isoleucine biosynthesis | 13              | 9                    | 0.011 | 0.079          | 1.869 |
| Propanoate metabolism                       | 18              | 9                    | 0.011 | 0.079          | 1.786 |
| Glycerolipid metabolism                     | 16              | 6                    | 0.011 | 0.079          | 1.604 |
| Arachidonic acid metabolism                 | 10              | 2                    | 0.014 | 0.087          | 1.473 |
